# Supplementary material for: Ontology to identify pregnant women in electronic health records: primary care sentinel network database study
Source: PubMed Central journal article supplement — BMJ Health Care Inform. 2019 Jul 4;26(1):e100013. doi: 10.1136/bmjhci-2019-100013 (PMC7062332; doi:10.1136/bmjhci-2019-100013), 2019-07-04
Supplement: bmjhci-2019-100013supp001.pdf [file bmjhci-2019-100013supp001.pdf]

## Supplementary file 1

### Sub categories of concepts based on frequency of used

#### Definite pregnancy sub categories

Each sub category includes any concepts that definitely indicate:

1. Current pregnancy
2. Performance of antenatal examination
3. Provision of antenatal care
4. Referral relating to current pregnancy
5. Length of gestation
6. Pregnancy test result positive
7. Threatened abortion
8. Performance of antenatal tests / investigations
9. Fetal observations
10. Diagnosis of gestational diabetes
11. Vomiting in pregnancy
12. Maternity booking
13. Issue of pregnancy claim form
14. Record of antenatal data
15. Record of pre-eclampsia
16. Complications of later pregnancy
17. Recording of fetal position
18. Miscellaneous – (may need to be more specific or eliminate)

#### Pregnancy term (delivered) sub categories

Each sub category includes any concepts that definitely indicate:

1. Delivery of potentially viable baby
2. Performance of postnatal examination
3. Performance of post natal visit
4. Provision of postnatal care
5. Recording of current breast feeding / lactation findings
6. Issue of completed maternity services claim
7. Postnatal / puerperal findings
8. Obstetric wound problems
9. Depression post partum
10. Presentation at delivery
11. Miscellaneous – (may need to be more specific or eliminate)

#### Pregnancy non-term sub categories

Each sub category includes concepts that definitely indicate:

1. Occurrence of miscarriage / abortion
2. Removal of products of conception
3. Current ectopic pregnancy
4. Occurrence of termination of pregnancy
5. Occurrence of intrauterine death
6. Presence of Mole

7. Occurrence of blighted ovum
8. Post miscarriage counselling
