# Supplementary material for: Ontology to identify pregnant women in electronic health records: primary care sentinel network database study
Source: PubMed Central journal article supplement — BMJ Health Care Inform. 2019 Jul 4;26(1):e100013. doi: 10.1136/bmjhci-2019-100013 (PMC7062332; doi:10.1136/bmjhci-2019-100013), 2019-07-04
Supplement: bmjhci-2019-100013supp002.pdf [file bmjhci-2019-100013supp002.pdf]

## Supplementary File 2

### Components of the pregnancy ontology toolkit

| <b>Toolkit Element</b>                                | <b>Description</b>                                                                                                                                                                                                                                                                                                                                                                                                                                                                                                                                                                                                                                                                                                                                                                                                                                                                                                                                                    |
|-------------------------------------------------------|-----------------------------------------------------------------------------------------------------------------------------------------------------------------------------------------------------------------------------------------------------------------------------------------------------------------------------------------------------------------------------------------------------------------------------------------------------------------------------------------------------------------------------------------------------------------------------------------------------------------------------------------------------------------------------------------------------------------------------------------------------------------------------------------------------------------------------------------------------------------------------------------------------------------------------------------------------------------------|
| <b>Pregnancy ontology</b>                             | <p>The pregnancy ontology contains all concepts associated to the pregnancy case identification algorithm. The concepts associated to the pregnancy case identification algorithm are organised across multiple dimensions including time-specific events (i.e. start pregnancy, term (delivered) pregnancy, non-term pregnancy) and special codes that have a significant role in the algorithm (i.e. last menstrual period)</p> <p><a href="https://bioportal.bioontology.org/ontologies/PREGONTO">https://bioportal.bioontology.org/ontologies/PREGONTO</a></p>                                                                                                                                                                                                                                                                                                                                                                                                    |
| <b>Clinical code annotation for the ontology</b>      | <p>This is provided as a spreadsheet to allow the concepts in the ontology to be mapped to any coding system. As the original development of the pregnancy case identification algorithm was done in context of primary care in UK, the ontology already contains clinical codes in Read v2 and CTV3 format. The separation of pregnancy concepts from clinical codes allows the pregnancy case identification algorithm to be utilised in database independent of the clinical coding system used for recording data.</p> <p>Read v2 - <a href="https://clininf.eu/wp-content/uploads/2018/07/Pregnancy-ontology-code-mappings-Read2v10.xls">https://clininf.eu/wp-content/uploads/2018/07/Pregnancy-ontology-code-mappings-Read2v10.xls</a></p> <p>CTV2 - <a href="https://clininf.eu/wp-content/uploads/2018/07/Pregnancy-ontology-code-mappings-CTV3-v3.xlsx">https://clininf.eu/wp-content/uploads/2018/07/Pregnancy-ontology-code-mappings-CTV3-v3.xlsx</a></p> |
| <b>Pregnancy case identification algorithm script</b> | <p>The algorithm is in the form of a SQL script which utilises the pregnancy ontology to execute the conditional logic that helps to identify pregnancy cases in the database.</p> <p><a href="https://clininf.eu/wp-content/uploads/2018/07/Pregnancy-case-identification-algorithm-v1.zip">https://clininf.eu/wp-content/uploads/2018/07/Pregnancy-case-identification-algorithm-v1.zip</a></p>                                                                                                                                                                                                                                                                                                                                                                                                                                                                                                                                                                     |
| <b>Input/output table format specification</b>        | <p>This specification informs the structure of the input tables that the source data needs to be structured in order to be compatible with the pregnancy case identification algorithm. The output table format describes the structure of the output produce by executing the pregnancy case identification algorithm.</p> <p><a href="https://clininf.eu/wp-content/uploads/2018/07/pregnancy-ontology-input-output-specification-v1-1.pdf">https://clininf.eu/wp-content/uploads/2018/07/pregnancy-ontology-input-output-specification-v1-1.pdf</a></p>                                                                                                                                                                                                                                                                                                                                                                                                            |
| <b>Configuration settings</b>                         | <p>External configuration file: This is a text file which is used to control the output of the pregnancy case identification algorithm based on the user needs. The configurable parameters include age range of interest, time period of interest. A limited set of configuration options are also available within the pregnancy case identification algorithm script which will allow the user to control aspects of the algorithm (e.g. number of weeks to consider as the pregnancy period). In most cases, these setting will not require to be changed.</p> <p><a href="https://clininf.eu/wp-content/uploads/2018/07/pcia-configuration-variables-v1.pdf">https://clininf.eu/wp-content/uploads/2018/07/pcia-configuration-variables-v1.pdf</a></p>                                                                                                                                                                                                           |
